# Supplementary material
Source: publisher site journal article supplement (https://www.dovepress.com/article/533707)
Supplement: Supplementary file 1 [file 533707%20Revised%20Supplemental%20materials.docx]

**Reduced platelet aggregation and plasma cytokine levels mitigate progressive metabolic dysfunction-associated fatty liver disease**

**Short title:** MASLD and platelet activation

Tobias Harm1,MD, Anne-Katrin Rohlfing1,PhD, Jessica-Kristin Henes1,MD, Nicole Manzat1, Michal Droppa1,MD, Malte N Bongers2,MD, Mathias Heikenwaelder3,4,MD, Karin Anne Lydia Müller1, MD, Meinrad Paul Gawaz1, MD, Dominik Rath1, MD*

1Department of Cardiology and Angiology, University Hospital Tübingen, Eberhard Karls University Tübingen, Tübingen, Germany

2Department of Diagnostic and Interventional Radiology, University Hospital Tübingen, Tübingen, Germany

3Division of Chronic Inflammation and Cancer, German Cancer Research Center Heidelberg (DKFZ), Heidelberg, Germany

4The M3 Research Institute, Eberhard Karls University Tübingen, Tübingen, Germany.

***Address for correspondence:**

**Dominik Rath, MD**

Department of Cardiology and Angiology

University Hospital Tübingen, Eberhard Karls University Tübingen

Otfried-Müller-Str. 10, 72076 Tübingen, Germany

Tel.: +49 (0) 7071 29 83688, Fax: +49 (0) 7071 29 5749

E-Mail: [dominik.rath@med.uni-tuebingen.de](mailto:dominik.rath@med.uni-tuebingen.de)

**Supplemental Material**

Table S1

Figures S1-S4

**Supplemental Table S1.** Logistic regression model identified antiplatelet therapy as an independent parameter significantly (p<0.05) associated with reduced hepatic fat content in patients with MASLD

|  | **Multivariable Regression Analysis** | | | | |
| --- | --- | --- | --- | --- | --- |
|  | |  |  |  |  |
| Variables | | ß Coefficient | 95% CI | Std. Error | p-Value |
| **Antiplatelet Therapy** | | -1.20 | -2.34, -0.07 | 0.58 | **0.038** |
| DAPT | | -0.80 | -0.34, 1.95 | 0.58 | 0.169 |
| New Statin Therapy | | -0.39 | -1.31, 0.53 | 0.47 | 0.405 |
| Age | | 0.02 | -0.07, 0.13 | 0.05 | 0.647 |
| Female Gender | | -0.05 | -1.04, 0.94 | 0.51 | 0.914 |
| Baseline Hepatic Fat Content | | 0.09 | -0.05, 0.24 | 0.08 | 0.231 |
|  |  | | | | |
| *95% CI, confidence interval; DAPT, dual antiplatelet therapy; Std. error, standard error.* | | | | | |

**Supplemental Figure S1.** Screening, treatment, data acquisition, six-months follow-up, and analysis of patients with MASLD enrolled in this prospective study.

**Supplemental Figure S2. Platelet-derived chemokines are linked to progressive liver damage. (A)-(D)** Correlation analysis of hepatically predominant alanine transaminase (ALT) uncovered a significant association with morphological determinants on liver MRI including liver volume and hepatic fat content.

**Supplemental Figure S3. Platelet-derived chemokines are linked to progressive liver damage. (A)** Mean platelet volume and levels of circulating chemokines including **(B)** IP10, and **(C)** MIG were increased in patients with elevated AST levels. Likewise, enhanced concentrations of chemokines **(D)** MCP1, **(E)** IP10, and **(F)** MIG were significantly (p<0.05) associated with elevated ALT concentrations.

**Supplemental Figure S4. Antiplatelet therapy is an independent predictor of decreasing hepatic steatosis in patients with MASLD.** Receiver operating characteristic (ROC) curve depicting the diagnostic accuracy of the multivariable regression model assessing the course of hepatic steatosis on MRI. Area under the curve (AUC) and 95% confidence intervals (CI) were derived from 1000 bootstrap repetitions and integrated age, gender, baseline hepatic fat content, new statin therapy, antiplatelet therapy and type of antiplatelet therapy.
